# Supplementary figures and images for: Fractional Diffusion with Geometric Constraints: Application to Signal Decay in Magnetic Resonance Imaging (MRI)
Source: MDPI journal article supplement (doi:10.3390/math10030389), 2022-01-27

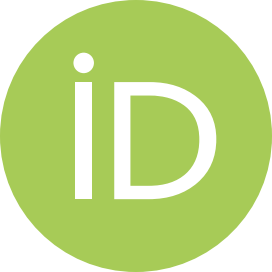

Supplement: s1 [file s1]

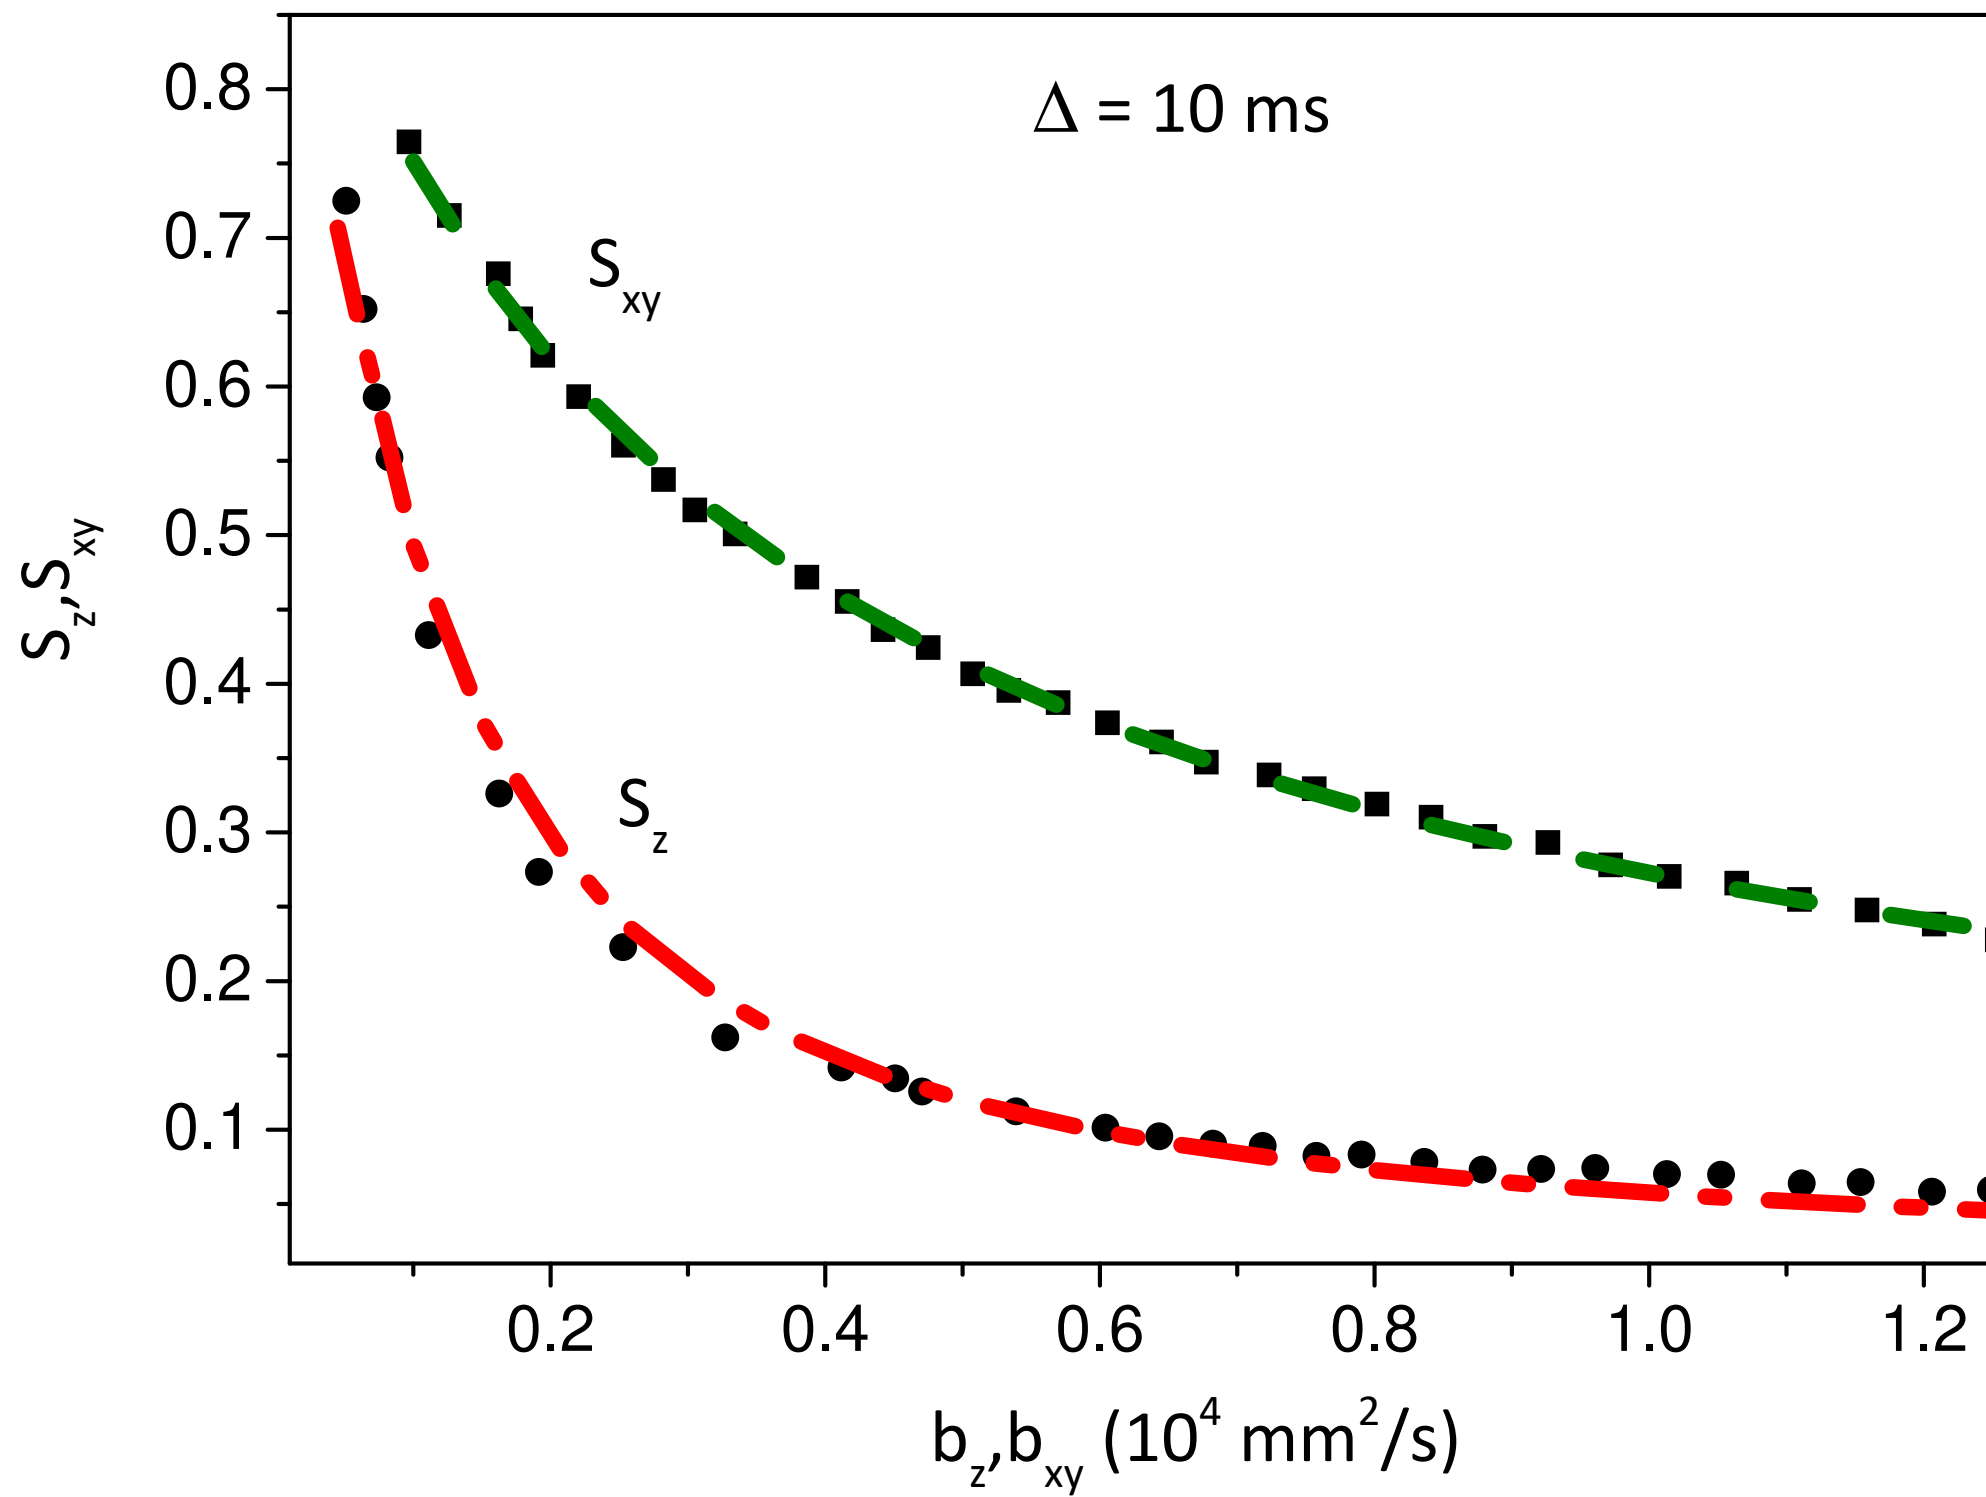

Supplement: s1 [file s1]

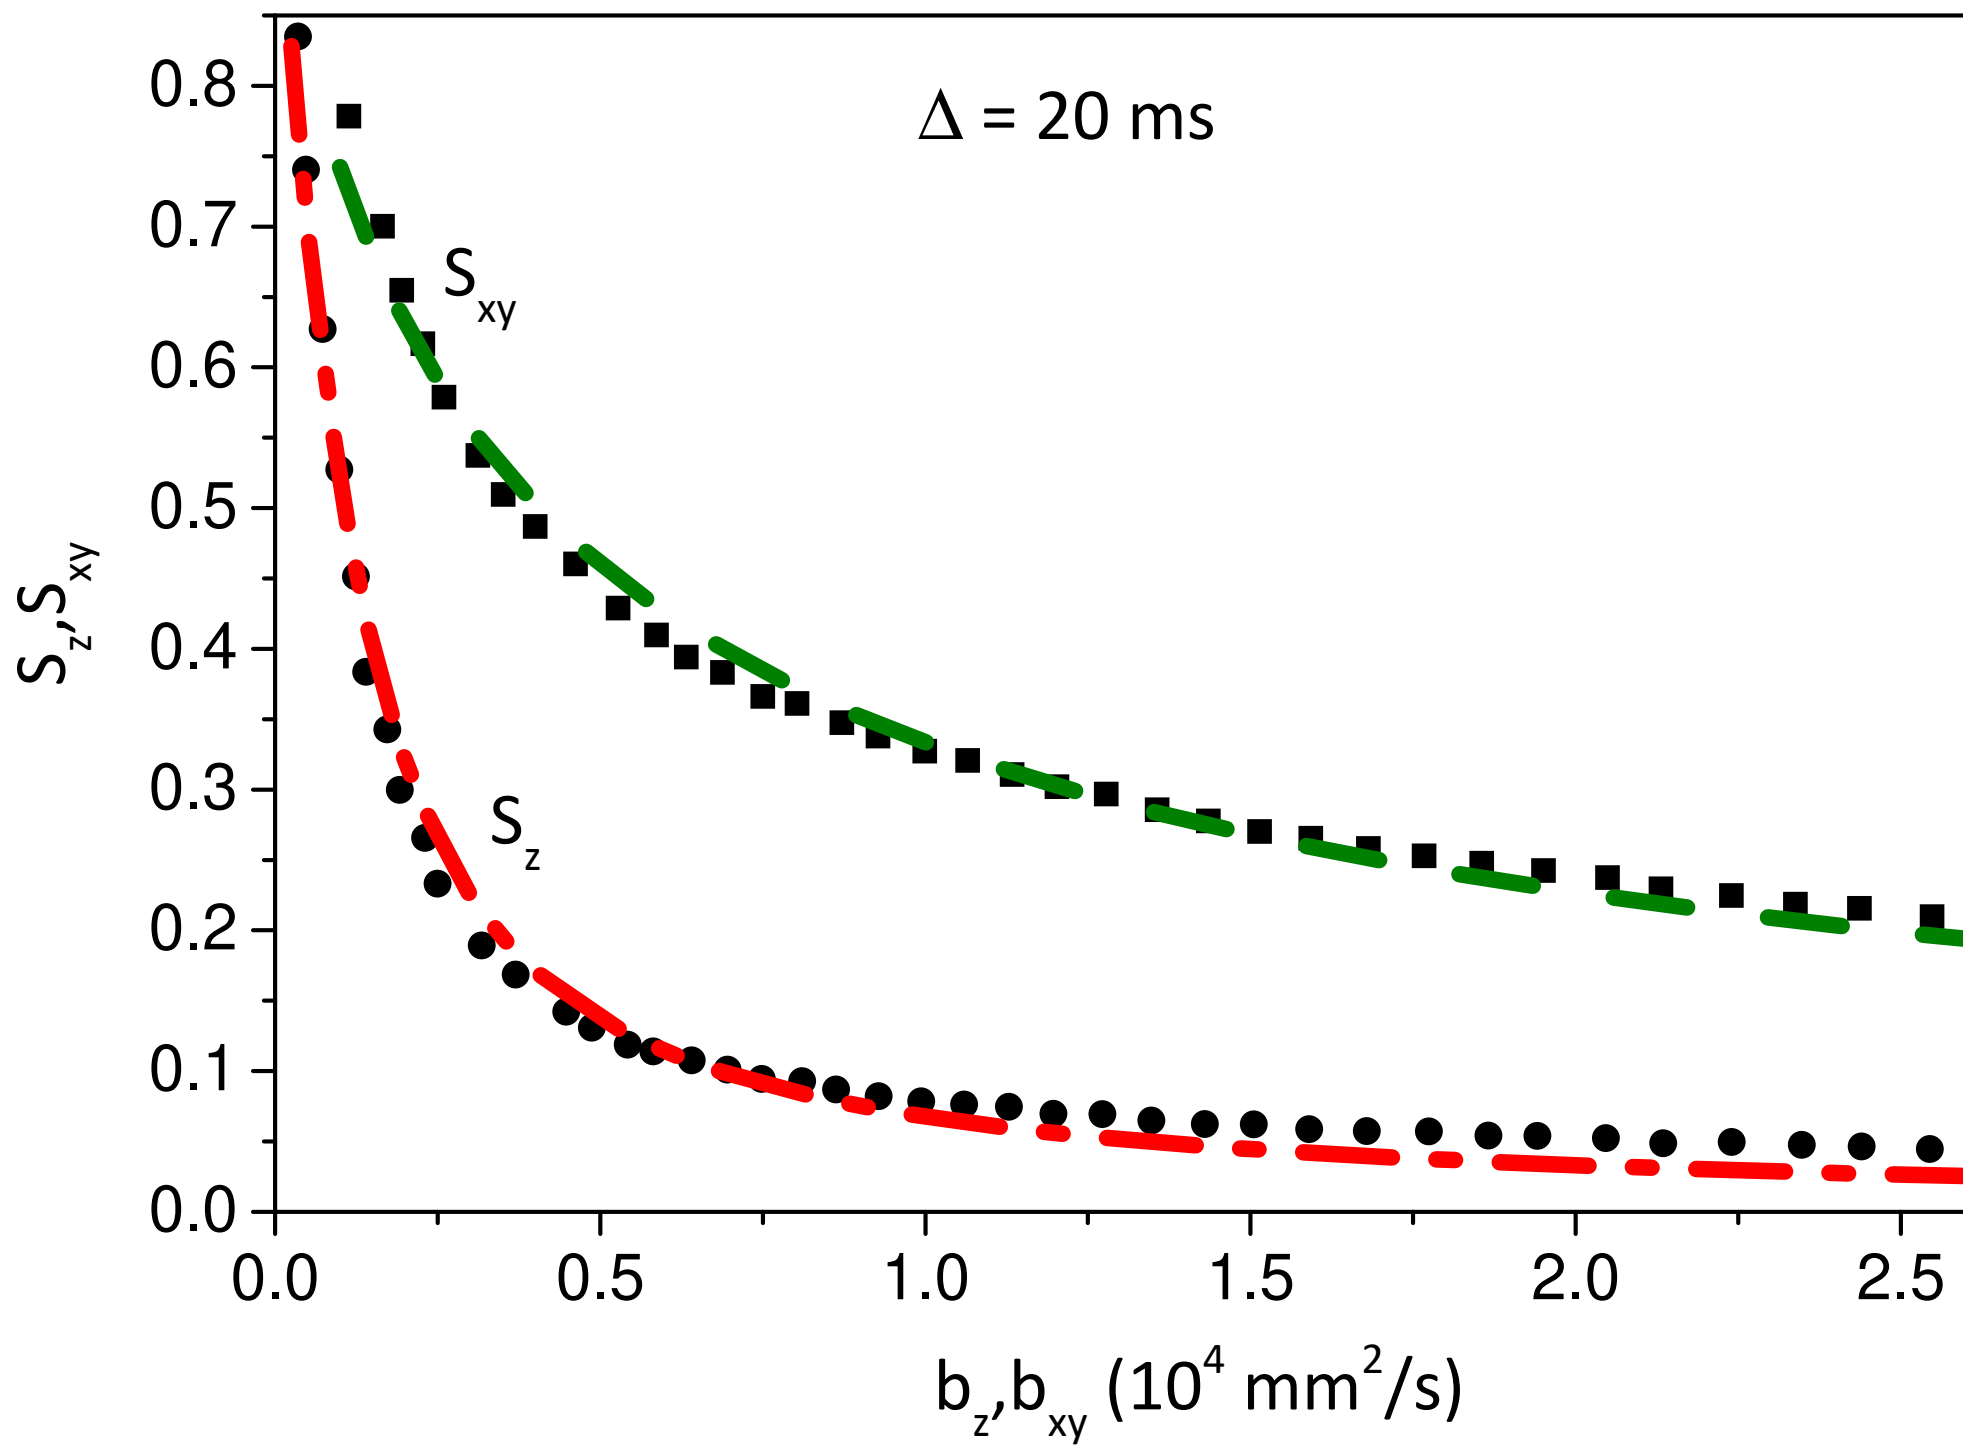

Supplement: s1 [file s1]

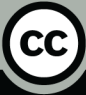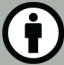

BY

Supplement: s1 [file s1]

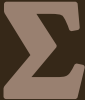

*mathematics*

Supplement: s1 [file s1]
